# Supplementary material for: Epidemiology of Plasmodium malariae and Plasmodium ovale spp. in a highly malaria-endemic country: a longitudinal cohort study in Kinshasa Province, Democratic Republic of Congo
Source: bioRxiv or medRxiv preprint supplement (doi:10.1101/2023.04.20.23288826), 2023-04-25
Supplement: Supplementary file [file media-1.pdf]

## SUPPLEMENT TO:

### **Epidemiology of *Plasmodium malariae* and *Plasmodium ovale* spp. in a highly malaria-endemic country: A longitudinal cohort study in Kinshasa Province, Democratic Republic of Congo**

**Authors:** Rachel Sendor<sup>1,\*</sup>, Kristin Banek<sup>2</sup>, Melchior Mwandagilirwa Kashamuka<sup>3</sup>, Nono Mvuama<sup>3</sup>, Joseph A. Bala<sup>3</sup>, Marthe Nkalani<sup>3</sup>, Georges Kihuma<sup>3</sup>, Joseph Atibu<sup>3</sup>, Kyaw L. Thwai<sup>2</sup>, W. Matthew Svec<sup>4</sup>, Varun Goel<sup>5</sup>, Tommy Nseka<sup>3</sup>, Jessica T. Lin<sup>2,6</sup>, Jeffrey A. Bailey<sup>7</sup>, Michael Emch<sup>1,5</sup>, Margaret Carrel<sup>8</sup>, Jonathan J. Juliano<sup>1,2,6</sup>, Antoinette Tshetu<sup>3,¶</sup>, Jonathan B. Parr<sup>2,6,¶</sup>

#### **Affiliations:**

- <sup>1</sup> Department of Epidemiology, Gillings School of Global Public Health, University of North Carolina at Chapel Hill, Chapel Hill, North Carolina, United States of America
- <sup>2</sup> Institute for Global Health and Infectious Diseases, University of North Carolina at Chapel Hill, Chapel Hill, North Carolina, United States of America
- <sup>3</sup> Ecole de Santé Publique, Faculté de Médecine, University of Kinshasa, Kinshasa, Democratic Republic of the Congo
- <sup>4</sup> University of North Carolina at Chapel Hill, Chapel Hill, North Carolina, United States of America
- <sup>5</sup> Department of Geography, University of North Carolina at Chapel Hill, Chapel Hill, North Carolina, United States of America
- <sup>6</sup> Division of Infectious Diseases, School of Medicine, University of North Carolina at Chapel Hill, Chapel Hill, North Carolina, United States of America
- <sup>7</sup> Department of Pathology and Laboratory Medicine and Center for Computational Molecular Biology, Brown University, Providence, Rhode Island, United States of America
- <sup>8</sup> Department of Geographical and Sustainability Sciences, University of Iowa, Iowa City, Iowa, United States of America

\* Corresponding author: E-mail: [rachel.sendor@unc.edu](mailto:rachel.sendor@unc.edu) (RS)

¶ AT and JBP are joint senior authors.

**Short Title:** Non-falciparum malaria epidemiology in the DRC

**Supplementary Table 1. PCR primers, probes, and assay conditions**

| <b>Duplex Assay: <i>P. malariae</i>-specific, and <i>P. ovale</i>-specific, 18S rRNA</b> |                                                                          |          |            |
|------------------------------------------------------------------------------------------|--------------------------------------------------------------------------|----------|------------|
| <b>Adapted from:</b>                                                                     | Rougemont M et al. <i>J Clin Microbiology</i> 2004. 42(12):5636-43.      |          |            |
| <b>Forward Primer – <i>Pm</i> (5'→3')</b>                                                | CCG ACT AGG TGT TGG ATG ATA GAG TAA A                                    |          |            |
| <b>Reverse Primer – <i>Pm</i> (5'→3')</b>                                                | AAC CCA AAG ACT TTG ATT TCT CAT AA                                       |          |            |
| <b>Forward Primer – <i>Po</i> (5'→3')</b>                                                | CCG ACT AGG TTT TGG ATG AAA GAT TTT T                                    |          |            |
| <b>Reverse Primer – <i>Po</i> (5'→3')</b>                                                | AAC CCA AAG ACT TTG ATT TCT CAT AA                                       |          |            |
| <b>Probe – <i>Pm</i> (5'→3')</b>                                                         | FAM-CTA TCT AAA AGA AAC ACT CAT-MGBNFQ                                   |          |            |
| <b>Probe – <i>Po</i> (5'→3')</b>                                                         | VIC-CGA AAG GAA TTT TCT TAT T-MGBNFQ                                     |          |            |
| <b>Cycling conditions:</b>                                                               | Temp                                                                     | Duration | No. Cycles |
|                                                                                          | 50C                                                                      | 2 min    | x1         |
|                                                                                          | 95C                                                                      | 10 min   | x1         |
|                                                                                          | 95C                                                                      | 15 sec   | x45        |
|                                                                                          | 60C                                                                      | 1 min    |            |
| <b>Reaction conditions:</b>                                                              | Roche FastStart Universal Probe Master (Rox)                             |          |            |
|                                                                                          | Fwd primers                                                              | 20µM     |            |
|                                                                                          | Rev primers                                                              | 20µM     |            |
|                                                                                          | Probes                                                                   | 20µM     |            |
|                                                                                          | DNA                                                                      | 2 µL     |            |
|                                                                                          | Total volume                                                             | 12 µL    |            |
| <b><i>P. falciparum</i>-specific LDH</b>                                                 |                                                                          |          |            |
| <b>Adapted from:</b>                                                                     | Pickard AL et al. <i>Antimicrob. Agents Chemo</i> 2003. 47(8):2418-2423. |          |            |
| <b>Forward Primer (5'→3')</b>                                                            | ACGATTTGGCTGGAGCAGAT                                                     |          |            |
| <b>Reverse Primer (5'→3')</b>                                                            | TCTCTATTCCATTCTTTGTCACTCTTTC                                             |          |            |
| <b>Probe (5'→3')</b>                                                                     | FAM/ AGTAATAGTAACAGCTGGATTACCAAGGCCCCA /TAMRA                            |          |            |
| <b>Cycling conditions:</b>                                                               | Temp                                                                     | Duration | No. Cycles |
|                                                                                          | 50C                                                                      | 2 min    | x1         |
|                                                                                          | 95C                                                                      | 10 min   | x1         |
|                                                                                          | 95C                                                                      | 15 sec   | x40        |
|                                                                                          | 60C                                                                      | 1 min    |            |
| <b>Reaction conditions:</b>                                                              | Roche FastStart Universal Probe Master (Rox)                             |          |            |
|                                                                                          | Fwd primer                                                               | 200nM    |            |
|                                                                                          | Rev primer                                                               | 200nM    |            |
|                                                                                          | Probe                                                                    | 100nM    |            |
|                                                                                          | Template                                                                 | 2 µl     |            |
|                                                                                          | Total volume                                                             | 12 µl    |            |

<sup>1</sup>Duplex PCR was carried out to 45 cycle thresholds for *P. malariae* and *P. ovale* spp. detection; however, samples were considered positive if amplification under 40 Cts only, due to observed variability in this assay at later cycle thresholds.

**Supplementary Table 2. Comparison of participant characteristics between survey population and clinic subpopulation.**

| Participant Baseline Characteristics<br><i>no. (%)</i> | Population Type <sup>1</sup>                    |                                     |                     | p-value <sup>3</sup> | SMD   |
|--------------------------------------------------------|-------------------------------------------------|-------------------------------------|---------------------|----------------------|-------|
|                                                        | Survey-based Population<br>n=1,565 participants | Also in Clinic-based Subpopulation? |                     |                      |       |
|                                                        |                                                 | Yes<br>n=1,050 (67.1%)              | No<br>n=515 (32.9%) |                      |       |
| Age at visit (years)                                   |                                                 |                                     |                     |                      |       |
| <5                                                     | 302 (19.3)                                      | 229 (21.8)                          | 73 (14.2)           | <0.001               | 0.276 |
| 5-14                                                   | 500 (31.9)                                      | 354 (33.7)                          | 146 (28.3)          |                      |       |
| 15+                                                    | 763 (48.8)                                      | 467 (44.5)                          | 296 (57.5)          |                      |       |
| <i>Missing</i>                                         | 0                                               | 0                                   | 0                   |                      |       |
| Sex                                                    |                                                 |                                     |                     |                      |       |
| Female                                                 | 863 (55.1)                                      | 587 (55.9)                          | 276 (53.6)          | 0.388                | 0.046 |
| Male                                                   | 702 (44.9)                                      | 463 (44.1)                          | 239 (46.4)          |                      |       |
| <i>Missing</i>                                         | 0                                               | 0                                   | 0                   |                      |       |
| Site                                                   |                                                 |                                     |                     |                      |       |
| Voix de Peuple                                         | 385 (24.6)                                      | 230 (21.9)                          | 155 (30.1)          | <0.001               | 0.351 |
| Bu                                                     | 209 (13.4)                                      | 171 (16.3)                          | 38 (7.4)            |                      |       |
| Impuru                                                 | 211 (13.5)                                      | 136 (13.0)                          | 75 (14.6)           |                      |       |
| Pema                                                   | 243 (15.5)                                      | 180 (17.1)                          | 63 (12.2)           |                      |       |
| Kimpoko                                                | 167 (10.7)                                      | 111 (10.6)                          | 56 (10.9)           |                      |       |
| Ngamanzo                                               | 258 (16.5)                                      | 167 (15.9)                          | 91 (17.7)           |                      |       |
| Iye                                                    | 92 (5.9)                                        | 55 (5.2)                            | 37 (7.2)            |                      |       |
| <i>Missing</i>                                         | 0                                               | 0                                   | 0                   |                      |       |
| Rurality (by health area)                              |                                                 |                                     |                     |                      |       |
| Urban                                                  | 385 (24.6)                                      | 230 (21.9)                          | 155 (30.1)          | <0.001               | 0.262 |
| Peri-urban                                             | 517 (33.0)                                      | 333 (31.7)                          | 184 (35.7)          |                      |       |
| Rural                                                  | 663 (42.4)                                      | 487 (46.4)                          | 176 (34.2)          |                      |       |
| <i>Missing</i>                                         | 0                                               | 0                                   | 0                   |                      |       |
| Wealth quintile                                        |                                                 |                                     |                     |                      |       |
| Poorest                                                | 318 (20.3)                                      | 226 (21.5)                          | 92 (17.9)           | 0.011                | 0.194 |
| Poorer                                                 | 314 (20.1)                                      | 209 (19.9)                          | 105 (20.4)          |                      |       |
| Average                                                | 311 (19.9)                                      | 223 (21.2)                          | 88 (17.1)           |                      |       |
| Wealthier                                              | 304 (19.4)                                      | 202 (19.2)                          | 102 (19.8)          |                      |       |
| Wealthiest                                             | 318 (20.3)                                      | 190 (18.1)                          | 128 (24.9)          |                      |       |
| <i>Missing</i>                                         | 0                                               | 0                                   | 0                   |                      |       |
| Fever at Baseline <sup>2</sup>                         |                                                 |                                     |                     |                      |       |
| Yes                                                    | 382 (24.5)                                      | 272 (26.0)                          | 110 (21.5)          | 0.052                | 0.106 |
| No                                                     | 1176 (75.5)                                     | 774 (74.0)                          | 402 (78.5)          |                      |       |
| <i>Missing</i>                                         | 7                                               | 4                                   | 3                   |                      |       |
| RDT+ at Baseline                                       |                                                 |                                     |                     |                      |       |
| Yes                                                    | 429 (27.4)                                      | 285 (27.2)                          | 144 (28.0)          | 0.77                 | 0.019 |
| No                                                     | 1134 (72.6)                                     | 764 (72.8)                          | 370 (72.0)          |                      |       |
| <i>Missing</i>                                         | 2                                               | 1                                   | 1                   |                      |       |
| Seasonality of visit                                   |                                                 |                                     |                     |                      |       |
| Rainy                                                  | 1180 (75.4)                                     | 820 (78.1)                          | 360 (69.9)          | 0.001                | 0.188 |
| Dry                                                    | 385 (24.6)                                      | 230 (21.9)                          | 155 (30.1)          |                      |       |

| Participant Baseline Characteristics<br><i>no. (%)</i> | Population Type <sup>1</sup>                    |                                     |                     | p-value <sup>3</sup> | SMD   |
|--------------------------------------------------------|-------------------------------------------------|-------------------------------------|---------------------|----------------------|-------|
|                                                        | Survey-based Population<br>n=1,565 participants | Also in Clinic-based Subpopulation? |                     |                      |       |
|                                                        |                                                 | Yes<br>n=1,050 (67.1%)              | No<br>n=515 (32.9%) |                      |       |
| <i>Missing</i>                                         | 0                                               | 0                                   | 0                   |                      |       |
| Slept under bednet at Baseline                         |                                                 |                                     |                     |                      |       |
| Yes                                                    | 705 (45.0)                                      | 480 (45.7)                          | 225 (43.7)          | 0.482                | 0.041 |
| No                                                     | 860 (55.0)                                      | 570 (54.3)                          | 290 (56.3)          |                      |       |
| Missing                                                | 0                                               | 0                                   | 0                   |                      |       |
| Antimalarials taken within prior 6 months              |                                                 |                                     |                     |                      |       |
| Yes                                                    | 394 (25.4)                                      | 277 (26.6)                          | 117 (22.8)          | 0.119                | 0.088 |
| No                                                     | 1160 (74.6)                                     | 764 (73.4)                          | 396 (77.2)          |                      |       |
| Missing                                                | 11                                              | 9                                   | 2                   |                      |       |
| <i>P. falciparum</i> PCR +                             |                                                 |                                     |                     |                      |       |
| Yes                                                    | 484 (30.9)                                      | 314 (29.9)                          | 170 (33.0)          | 0.222                | 0.067 |
| <i>Mixed-species</i>                                   | 35 (7.2)                                        | 25 (8.0)                            | 10 (5.9)            | 0.51                 | 0.082 |
| <i>Single-species</i>                                  | 449 (92.8)                                      | 289 (92.0)                          | 160 (94.1)          |                      |       |
| No                                                     | 1081 (69.1)                                     | 736 (70.1)                          | 345 (67.0)          |                      |       |
| Missing                                                | 0                                               | 0                                   | 0                   |                      |       |
| <i>P. malariae</i> PCR +                               |                                                 |                                     |                     |                      |       |
| Yes                                                    | 47 (3.0)                                        | 33 (3.1)                            | 14 (2.7)            | 0.753                | 0.025 |
| <i>Mixed-species</i>                                   | 31 (66.0)                                       | 22 (66.7)                           | 9 (64.3)            | 1                    | 0.05  |
| <i>Single-species</i>                                  | 16 (34.0)                                       | 11 (33.3)                           | 5 (35.7)            |                      |       |
| No                                                     | 1518 (97.0)                                     | 1017 (96.9)                         | 501 (97.3)          |                      |       |
| Missing                                                | 0                                               | 0                                   | 0                   |                      |       |
| <i>P. ovale</i> spp. PCR +                             |                                                 |                                     |                     |                      |       |
| Yes                                                    | 6 (0.4)                                         | 5 (0.5)                             | 1 (0.2)             | 0.67                 | 0.049 |
| <i>Mixed-species</i>                                   | 4 (66.7)                                        | 3 (60.0)                            | 1 (100.0)           | 1                    | 1.155 |
| <i>Single-species</i>                                  | 2 (33.3)                                        | 2 (40.0)                            | 0 (0.0)             |                      |       |
| No                                                     | 1559 (99.6)                                     | 1045 (99.5)                         | 514 (99.8)          |                      |       |
| Missing                                                | 0                                               | 0                                   | 0                   |                      |       |

<sup>1</sup> The survey-based population comprises all participants in the study, as all participants completed the Baseline household survey. The clinic-based sub-population comprises a subset of the survey-based population who had at least 1 symptomatic clinic visit during the study period.

<sup>2</sup> Fever at Baseline survey was self-reported as "fever in the prior week"

<sup>3</sup> p-values compare baseline characteristics between those in the survey-based population who were vs. were not also included in the clinic-based symptomatic population.

**Supplemental Table 3. Baseline subject characteristics by species for the symptomatic clinic subpopulation**

| Baseline Participant Characteristics<br>no. (%) | Clinic-based Pop.<br>N=1,050 | Baseline Malaria Infection by Species |                     |                      |                     |                      |                   |
|-------------------------------------------------|------------------------------|---------------------------------------|---------------------|----------------------|---------------------|----------------------|-------------------|
|                                                 |                              | <i>P. malariae</i>                    |                     | <i>P. ovale</i> spp. |                     | <i>P. falciparum</i> |                   |
|                                                 |                              | PCR Pos.<br>n=33                      | PCR Neg.<br>n=1,017 | PCR Pos.<br>n=5      | PCR Neg.<br>n=1,045 | PCR Pos.<br>n=314    | PCR Neg.<br>n=736 |
| <b>Age (years)</b>                              |                              |                                       |                     |                      |                     |                      |                   |
| <5                                              | 229 (21.8)                   | 4 (12.1)                              | 225 (22.1)          | 1 (20.0)             | 228 (21.8)          | 49 (15.6)            | 180 (24.5)        |
| 5-14                                            | 354 (33.7)                   | 23 (69.7)                             | 331 (32.5)          | 2 (40.0)             | 352 (33.7)          | 161 (51.3)           | 193 (26.2)        |
| 15+                                             | 467 (44.5)                   | 6 (18.2)                              | 461 (45.3)          | 2 (40.0)             | 465 (44.5)          | 104 (33.1)           | 363 (49.3)        |
| <b>Sex</b>                                      |                              |                                       |                     |                      |                     |                      |                   |
| Female                                          | 587 (55.9)                   | 19 (57.6)                             | 568 (55.9)          | 5 (100.0)            | 582 (55.7)          | 165 (52.5)           | 422 (57.3)        |
| Male                                            | 463 (44.1)                   | 14 (42.4)                             | 449 (44.1)          | 0 (0.0)              | 463 (44.3)          | 149 (47.5)           | 314 (42.7)        |
| <b>Urbanicity</b>                               |                              |                                       |                     |                      |                     |                      |                   |
| Rural                                           | 487 (46.4)                   | 21 (63.6)                             | 466 (45.8)          | 5 (100.0)            | 482 (46.1)          | 197 (62.7)           | 290 (39.4)        |
| Peri-urban                                      | 333 (31.7)                   | 10 (30.3)                             | 323 (31.8)          | 0 (0.0)              | 333 (31.9)          | 110 (35.0)           | 223 (30.3)        |
| Urban                                           | 230 (21.9)                   | 2 (6.1)                               | 228 (22.4)          | 0 (0.0)              | 230 (22.0)          | 7 (2.2)              | 223 (30.3)        |
| <b>Fever (≤1 week)</b>                          |                              |                                       |                     |                      |                     |                      |                   |
| Yes                                             | 272 (26.0)                   | 9 (28.1)                              | 263 (25.9)          | 4 (80.0)             | 268 (25.7)          | 110 (35.3)           | 162 (22.1)        |
| <b>RDT+</b>                                     |                              |                                       |                     |                      |                     |                      |                   |
| Yes                                             | 285 (27.2)                   | 20 (62.5)                             | 265 (26.1)          | 2 (40.0)             | 283 (27.1)          | 235 (75.1)           | 50 (6.8)          |
| <b>Bed Net Use (Prior Night)</b>                |                              |                                       |                     |                      |                     |                      |                   |
| Yes                                             | 480 (45.7)                   | 9 (27.3)                              | 471 (46.3)          | 2 (40.0)             | 478 (45.7)          | 127 (40.4)           | 353 (48.0)        |
| <b>Symptoms in Prior 6 mon.</b>                 |                              |                                       |                     |                      |                     |                      |                   |
| Yes                                             | 269 (25.7)                   | 7 (21.9)                              | 262 (25.8)          | 3 (60.0)             | 266 (25.5)          | 81 (26.0)            | 188 (25.6)        |
| <b>Tx with Antimalarials in Prior 6 mon.</b>    |                              |                                       |                     |                      |                     |                      |                   |
| Yes                                             | 277 (26.6)                   | 7 (21.9)                              | 270 (26.8)          | 1 (20.0)             | 276 (26.6)          | 76 (24.4)            | 201 (27.6)        |
| <b>Wealth Category</b>                          |                              |                                       |                     |                      |                     |                      |                   |
| Poorest                                         | 226 (21.5)                   | 5 (15.2)                              | 221 (21.7)          | 1 (20.0)             | 225 (21.5)          | 93 (29.6)            | 133 (18.1)        |
| Poorer                                          | 209 (19.9)                   | 14 (42.4)                             | 195 (19.2)          | 0 (0.0)              | 209 (20.0)          | 78 (24.8)            | 131 (17.8)        |
| Average                                         | 223 (21.2)                   | 6 (18.2)                              | 217 (21.3)          | 2 (40.0)             | 221 (21.1)          | 69 (22.0)            | 154 (20.9)        |
| Wealthier                                       | 202 (19.2)                   | 6 (18.2)                              | 196 (19.3)          | 2 (40.0)             | 200 (19.1)          | 69 (22.0)            | 133 (18.1)        |
| Wealthiest                                      | 190 (18.1)                   | 2 (6.1)                               | 188 (18.5)          | 0 (0.0)              | 190 (18.2)          | 5 (1.6)              | 185 (25.1)        |

**Supplemental Table 4. Participant characteristics across follow-up visits (Survey population)**

| Participant characteristics at each visit<br><i>no. (%)</i> | Household Survey Visits<br><i>(Active surveillance)</i> |                        |                        |                        | p-value <sup>3</sup> |
|-------------------------------------------------------------|---------------------------------------------------------|------------------------|------------------------|------------------------|----------------------|
|                                                             | Baseline<br>n=1,565                                     | Follow-up 1<br>n=1,447 | Follow-up 2<br>n=1,367 | Follow-up 3<br>n=1,303 |                      |
| No. subjects                                                | 1,565                                                   | 1,447                  | 1,367                  | 1,303                  |                      |
| Age at visit (years)                                        |                                                         |                        |                        |                        |                      |
| <5                                                          | 302 (19.3)                                              | 271 (18.7)             | 225 (16.5)             | 185 (14.2)             | 0.009                |
| 5-14                                                        | 500 (31.9)                                              | 480 (33.2)             | 443 (32.4)             | 453 (34.8)             |                      |
| 15+                                                         | 763 (48.8)                                              | 696 (48.1)             | 699 (51.1)             | 665 (51.0)             |                      |
| <i>Missing</i>                                              | 0                                                       | 0                      | 0                      | 0                      |                      |
| Sex                                                         |                                                         |                        |                        |                        |                      |
| Female                                                      | 863 (55.1)                                              | 800 (55.3)             | 757 (55.4)             | 707 (54.3)             | 0.935                |
| Male                                                        | 702 (44.9)                                              | 647 (44.7)             | 610 (44.6)             | 596 (45.7)             |                      |
| <i>Missing</i>                                              | 0                                                       | 0                      | 0                      | 0                      |                      |
| Rurality (by health area)                                   |                                                         |                        |                        |                        |                      |
| Urban                                                       | 385 (24.6)                                              | 342 (23.6)             | 307 (22.5)             | 300 (23.0)             | 0.384                |
| Peri-urban                                                  | 517 (33.0)                                              | 487 (33.7)             | 457 (33.4)             | 402 (30.9)             |                      |
| Rural                                                       | 663 (42.4)                                              | 618 (42.7)             | 603 (44.1)             | 601 (46.1)             |                      |
| <i>Missing</i>                                              | 0                                                       | 0                      | 0                      | 0                      |                      |
| Wealth quintile                                             |                                                         |                        |                        |                        |                      |
| Poorest                                                     | 318 (20.3)                                              | 294 (20.3)             | 290 (21.2)             | 274 (21.0)             | 0.994                |
| Poorer                                                      | 314 (20.1)                                              | 288 (19.9)             | 277 (20.3)             | 264 (20.3)             |                      |
| Average                                                     | 311 (19.9)                                              | 301 (20.8)             | 292 (21.4)             | 271 (20.8)             |                      |
| Wealthier                                                   | 304 (19.4)                                              | 284 (19.6)             | 255 (18.7)             | 249 (19.1)             |                      |
| Wealthiest                                                  | 318 (20.3)                                              | 280 (19.4)             | 253 (18.5)             | 245 (18.8)             |                      |
| <i>Missing</i>                                              | 0                                                       | 0                      | 0                      | 0                      |                      |
| Fever <sup>1</sup>                                          |                                                         |                        |                        |                        |                      |
| Yes                                                         | 382 (24.5)                                              | 173 (12.0)             | 249 (18.2)             | 120 (9.2)              | <0.001               |
| No                                                          | 1176 (75.5)                                             | 1273 (88.0)            | 1118 (81.8)            | 1183 (90.8)            |                      |
| <i>Missing</i>                                              | 7                                                       | 1                      | 0                      | 0                      |                      |
| RDT+                                                        |                                                         |                        |                        |                        |                      |
| Yes                                                         | 429 (27.4)                                              | 396 (27.4)             | 511 (37.4)             | 307 (23.6)             | <0.001               |
| No                                                          | 1134 (72.6)                                             | 1051 (72.6)            | 856 (62.6)             | 995 (76.4)             |                      |
| <i>Missing</i>                                              | 2                                                       | 0                      | 0                      | 1                      |                      |
| Slept under bednet the prior night                          |                                                         |                        |                        |                        |                      |
| Yes                                                         | 705 (45.0)                                              | 810 (56.0)             | 732 (53.5)             | 589 (45.2)             | <0.001               |
| No                                                          | 860 (55.0)                                              | 637 (44.0)             | 635 (46.5)             | 714 (54.8)             |                      |
| <i>Missing</i>                                              | 0                                                       | 0                      | 0                      | 0                      |                      |
| Seasonality of visit                                        |                                                         |                        |                        |                        |                      |
| Rainy                                                       | 1180 (75.4)                                             | 0 (0.0)                | 1365 (99.9)            | 19 (1.5)               | <0.001               |
| Dry                                                         | 385 (24.6)                                              | 1447 (100.0)           | 2 (0.1)                | 1284 (98.5)            |                      |
| <i>Missing</i>                                              | 0                                                       | 0                      | 0                      | 0                      |                      |
| Antimalarials taken within prior 6 months <sup>2</sup>      |                                                         |                        |                        |                        |                      |
| Yes                                                         | 394 (25.4)                                              | 559 (38.9)             | 625 (46.1)             | 569 (46.6)             | <0.001               |
| No                                                          | 1160 (74.6)                                             | 877 (61.1)             | 732 (53.9)             | 652 (53.4)             |                      |
| <i>Missing</i>                                              | 11                                                      | 11                     | 10                     | 82                     |                      |
| <i>P. falciparum</i> PCR +                                  |                                                         |                        |                        |                        |                      |
| Yes                                                         | 484 (30.9)                                              | 512 (35.5)             | 538 (39.6)             | 442 (34.1)             | <0.001               |

| Participant characteristics at each visit<br>no. (%) | Household Survey Visits<br>(Active surveillance) |                        |                        |                        | p-value <sup>3</sup> |
|------------------------------------------------------|--------------------------------------------------|------------------------|------------------------|------------------------|----------------------|
|                                                      | Baseline<br>n=1,565                              | Follow-up 1<br>n=1,447 | Follow-up 2<br>n=1,367 | Follow-up 3<br>n=1,303 |                      |
| <i>Mixed-species</i>                                 | 35 (7.2)                                         | 42 (8.2)               | 64 (11.9)              | 47 (10.6)              | 0.043 <sup>4</sup>   |
| <i>Single-species</i>                                | 449 (92.8)                                       | 470 (91.8)             | 474 (88.1)             | 395 (89.4)             |                      |
| No                                                   | 1081 (69.1)                                      | 930 (64.5)             | 820 (60.4)             | 853 (65.9)             |                      |
| Missing                                              | 0                                                | 5                      | 9                      | 8                      |                      |
| <i>P. malariae</i> PCR +                             |                                                  |                        |                        |                        |                      |
| Yes                                                  | 47 (3.0)                                         | 35 (2.4)               | 56 (4.1)               | 48 (3.7)               | 0.055 <sup>4</sup>   |
| <i>Mixed-species</i>                                 | 31 (66.0)                                        | 24 (68.6)              | 44 (78.6)              | 38 (79.2)              | 0.346 <sup>4</sup>   |
| <i>Single-species</i>                                | 16 (34.0)                                        | 11 (31.4)              | 12 (21.4)              | 10 (20.8)              |                      |
| No                                                   | 1518 (97.0)                                      | 1408 (97.6)            | 1300 (95.9)            | 1247 (96.3)            |                      |
| Missing                                              | 0                                                | 4                      | 11                     | 8                      |                      |
| <i>P. ovale</i> spp. PCR +                           |                                                  |                        |                        |                        |                      |
| Yes                                                  | 6 (0.4)                                          | 27 (1.9)               | 27 (2.0)               | 18 (1.4)               | <0.001 <sup>4</sup>  |
| <i>Mixed-species</i>                                 | 4 (66.7)                                         | 20 (74.1)              | 24 (88.9)              | 13 (72.2)              | 0.358 <sup>4</sup>   |
| <i>Single-species</i>                                | 2 (33.3)                                         | 7 (25.9)               | 3 (11.1)               | 5 (27.8)               |                      |
| No                                                   | 1559 (99.6)                                      | 1416 (98.1)            | 1329 (98.0)            | 1277 (98.6)            |                      |
| Missing                                              | 0                                                | 4                      | 11                     | 8                      |                      |

<sup>1</sup> Fever was self-reported as "fever in the prior week"

<sup>2</sup> Self-reported use of antimalarials in prior 6 months.

<sup>3</sup> Categorical variables were statistically compared using chi-squared tests; continuous variables were compared using the Kruskal-Wallis test of medians to account for non-normality. Missing data were excluded from statistical tests.

<sup>4</sup> p-values tested using Fisher's exact testing due to small cell sizes.

**Supplemental Table 5. Participant characteristics across follow-up (Clinic Subpopulation)**

| <i>Participant characteristics at visits</i><br><i>no. (%)</i> | Clinic Visits                               |                                              |                                     | p-value <sup>3</sup> |
|----------------------------------------------------------------|---------------------------------------------|----------------------------------------------|-------------------------------------|----------------------|
|                                                                | Time from Baseline Visit <sup>2</sup>       |                                              |                                     |                      |
|                                                                | All visits within first 12 months<br>n=1297 | All visits between 12 to 24 months<br>n=1203 | All visits after 24 months<br>n=907 |                      |
| No. subjects with visits                                       | 732                                         | 648                                          | 510                                 |                      |
| Age at visit (years)                                           |                                             |                                              |                                     |                      |
| <5                                                             | 353 (27.2)                                  | 305 (25.4)                                   | 172 (19.0)                          | <0.001               |
| 5-14                                                           | 481 (37.1)                                  | 434 (36.1)                                   | 386 (42.6)                          |                      |
| 15+                                                            | 463 (35.7)                                  | 462 (38.5)                                   | 348 (38.4)                          |                      |
| <i>Missing</i>                                                 | 0                                           | 2                                            | 1                                   |                      |
| Sex                                                            |                                             |                                              |                                     |                      |
| Female                                                         | 741 (57.1)                                  | 726 (60.3)                                   | 514 (56.7)                          | 0.153                |
| Male                                                           | 556 (42.9)                                  | 477 (39.7)                                   | 393 (43.3)                          |                      |
| <i>Missing</i>                                                 | 0                                           | 0                                            | 0                                   |                      |
| Site                                                           |                                             |                                              |                                     |                      |
| Voix de Peuple                                                 | 182 (14.0)                                  | 213 (17.7)                                   | 109 (12.0)                          | <0.001               |
| Bu                                                             | 232 (17.9)                                  | 305 (25.4)                                   | 236 (26.0)                          |                      |
| Impuru                                                         | 177 (13.6)                                  | 139 (11.6)                                   | 73 (8.0)                            |                      |
| Pema                                                           | 261 (20.1)                                  | 203 (16.9)                                   | 162 (17.9)                          |                      |
| Kimpoko                                                        | 217 (16.7)                                  | 114 (9.5)                                    | 104 (11.5)                          |                      |
| Ngamanzo                                                       | 181 (14.0)                                  | 187 (15.5)                                   | 190 (20.9)                          |                      |
| Iye                                                            | 47 (3.6)                                    | 42 (3.5)                                     | 33 (3.6)                            |                      |
| <i>Missing</i>                                                 | 0                                           | 0                                            | 0                                   |                      |
| Rurality (by health area)                                      |                                             |                                              |                                     |                      |
| Urban                                                          | 182 (14.0)                                  | 213 (17.7)                                   | 109 (12.0)                          | <0.001               |
| Peri-urban                                                     | 445 (34.3)                                  | 343 (28.5)                                   | 327 (36.1)                          |                      |
| Rural                                                          | 670 (51.7)                                  | 647 (53.8)                                   | 471 (51.9)                          |                      |
| <i>Missing</i>                                                 | 0                                           | 0                                            | 0                                   |                      |
| Wealth quintile                                                |                                             |                                              |                                     |                      |
| Poorest                                                        | 288 (22.2)                                  | 235 (19.5)                                   | 201 (22.2)                          | <0.001               |
| Poorer                                                         | 267 (20.6)                                  | 309 (25.7)                                   | 230 (25.4)                          |                      |
| Average                                                        | 332 (25.6)                                  | 279 (23.2)                                   | 232 (25.6)                          |                      |
| Wealthier                                                      | 267 (20.6)                                  | 192 (16.0)                                   | 156 (17.2)                          |                      |
| Wealthiest                                                     | 143 (11.0)                                  | 188 (15.6)                                   | 88 (9.7)                            |                      |
| <i>Missing</i>                                                 | 0                                           | 0                                            | 0                                   |                      |
| Fever <sup>1</sup>                                             |                                             |                                              |                                     |                      |
| Yes                                                            | 649 (75.1)                                  | 384 (48.7)                                   | 274 (44.4)                          | <0.001 <sup>4</sup>  |
| No                                                             | 215 (24.9)                                  | 404 (51.3)                                   | 343 (55.6)                          |                      |
| <i>Missing</i>                                                 | 433                                         | 415                                          | 290                                 |                      |
| RDT+                                                           |                                             |                                              |                                     |                      |
| Yes                                                            | 1145 (88.4)                                 | 948 (79.0)                                   | 687 (76.1)                          | <0.001 <sup>4</sup>  |
| No                                                             | 150 (11.6)                                  | 252 (21.0)                                   | 216 (23.9)                          |                      |
| <i>Missing</i>                                                 | 2                                           | 3                                            | 4                                   |                      |
| Anemia                                                         |                                             |                                              |                                     |                      |
| Severe                                                         | 48 (4.1)                                    | 32 (2.7)                                     | 17 (1.9)                            | 0.009                |
| Moderate                                                       | 249 (21.4)                                  | 230 (19.4)                                   | 167 (18.8)                          |                      |
| Mild                                                           | 202 (17.4)                                  | 242 (20.4)                                   | 197 (22.2)                          |                      |
| Not anemic                                                     | 662 (57.0)                                  | 681 (57.5)                                   | 506 (57.0)                          |                      |



| Participant characteristics at visits<br>no. (%) | Clinic Visits                               |                                              |                                     | p-value <sup>3</sup> |
|--------------------------------------------------|---------------------------------------------|----------------------------------------------|-------------------------------------|----------------------|
|                                                  | Time from Baseline Visit <sup>2</sup>       |                                              |                                     |                      |
|                                                  | All visits within first 12 months<br>n=1297 | All visits between 12 to 24 months<br>n=1203 | All visits after 24 months<br>n=907 |                      |
| Missing                                          | 136                                         | 18                                           | 20                                  |                      |
| Seasonality of visit                             |                                             |                                              |                                     |                      |
| Rainy                                            | 885 (68.2)                                  | 758 (63.0)                                   | 411 (45.3)                          | <0.001 <sup>4</sup>  |
| Dry                                              | 412 (31.8)                                  | 445 (37.0)                                   | 496 (54.7)                          |                      |
| Missing                                          | 0                                           | 0                                            | 0                                   |                      |
| <i>P. falciparum</i> PCR +                       |                                             |                                              |                                     |                      |
| Yes                                              | 829 (64.6)                                  | 636 (53.5)                                   | 544 (62.0)                          | <0.001               |
| Mixed-species                                    | 53 (6.4)                                    | 42 (6.6)                                     | 41 (7.5)                            | 0.694 <sup>4</sup>   |
| Single-species                                   | 775 (93.6)                                  | 593 (93.4)                                   | 503 (92.5)                          |                      |
| No                                               | 455 (35.4)                                  | 552 (46.5)                                   | 334 (38.0)                          |                      |
| Missing                                          | 13                                          | 15                                           | 29                                  |                      |
| <i>P. malariae</i> PCR +                         |                                             |                                              |                                     |                      |
| Yes                                              | 53 (4.1)                                    | 44 (3.7)                                     | 38 (4.3)                            | 0.757 <sup>4</sup>   |
| Mixed-species                                    | 35 (66.0)                                   | 25 (56.8)                                    | 29 (76.3)                           | 0.187 <sup>4</sup>   |
| Single-species                                   | 18 (34.0)                                   | 19 (43.2)                                    | 9 (23.7)                            |                      |
| No                                               | 1230 (95.9)                                 | 1142 (96.3)                                  | 842 (95.7)                          |                      |
| Missing                                          | 14                                          | 17                                           | 27                                  |                      |
| <i>P. ovale</i> spp. PCR +                       |                                             |                                              |                                     |                      |
| Yes                                              | 34 (2.7)                                    | 41 (3.5)                                     | 20 (2.3)                            | 0.255 <sup>4</sup>   |
| Mixed-species                                    | 19 (55.9)                                   | 21 (51.2)                                    | 12 (60.0)                           | 0.864 <sup>4</sup>   |
| Single-species                                   | 15 (44.1)                                   | 20 (48.8)                                    | 8 (40.0)                            |                      |
| No                                               | 1249 (97.3)                                 | 1145 (96.5)                                  | 860 (97.7)                          |                      |
| Missing                                          | 14                                          | 17                                           | 27                                  |                      |

<sup>1</sup> Fever was measured at time of clinic visit.

<sup>2</sup> Clinic visits could continue past the end of active surveillance till the end of 2017, for a total of 34 months from the first baseline visit. Clinic visits after 24 months occurred after all household surveys had concluded.

<sup>3</sup> Categorical variables were statistically compared using chi-squared tests; continuous variables were compared using the Kruskal-Wallis test of medians to account for non-normality. Missing data were excluded from statistical tests.

<sup>4</sup> p-values tested using Fisher's exact testing due to small cell sizes.

**Supplemental Figure 1 A-B. ) Factors associated with *P. malariae* and *P. ovale* spp. infection prevalence, compared to *P. falciparum*, stratified by study population.**

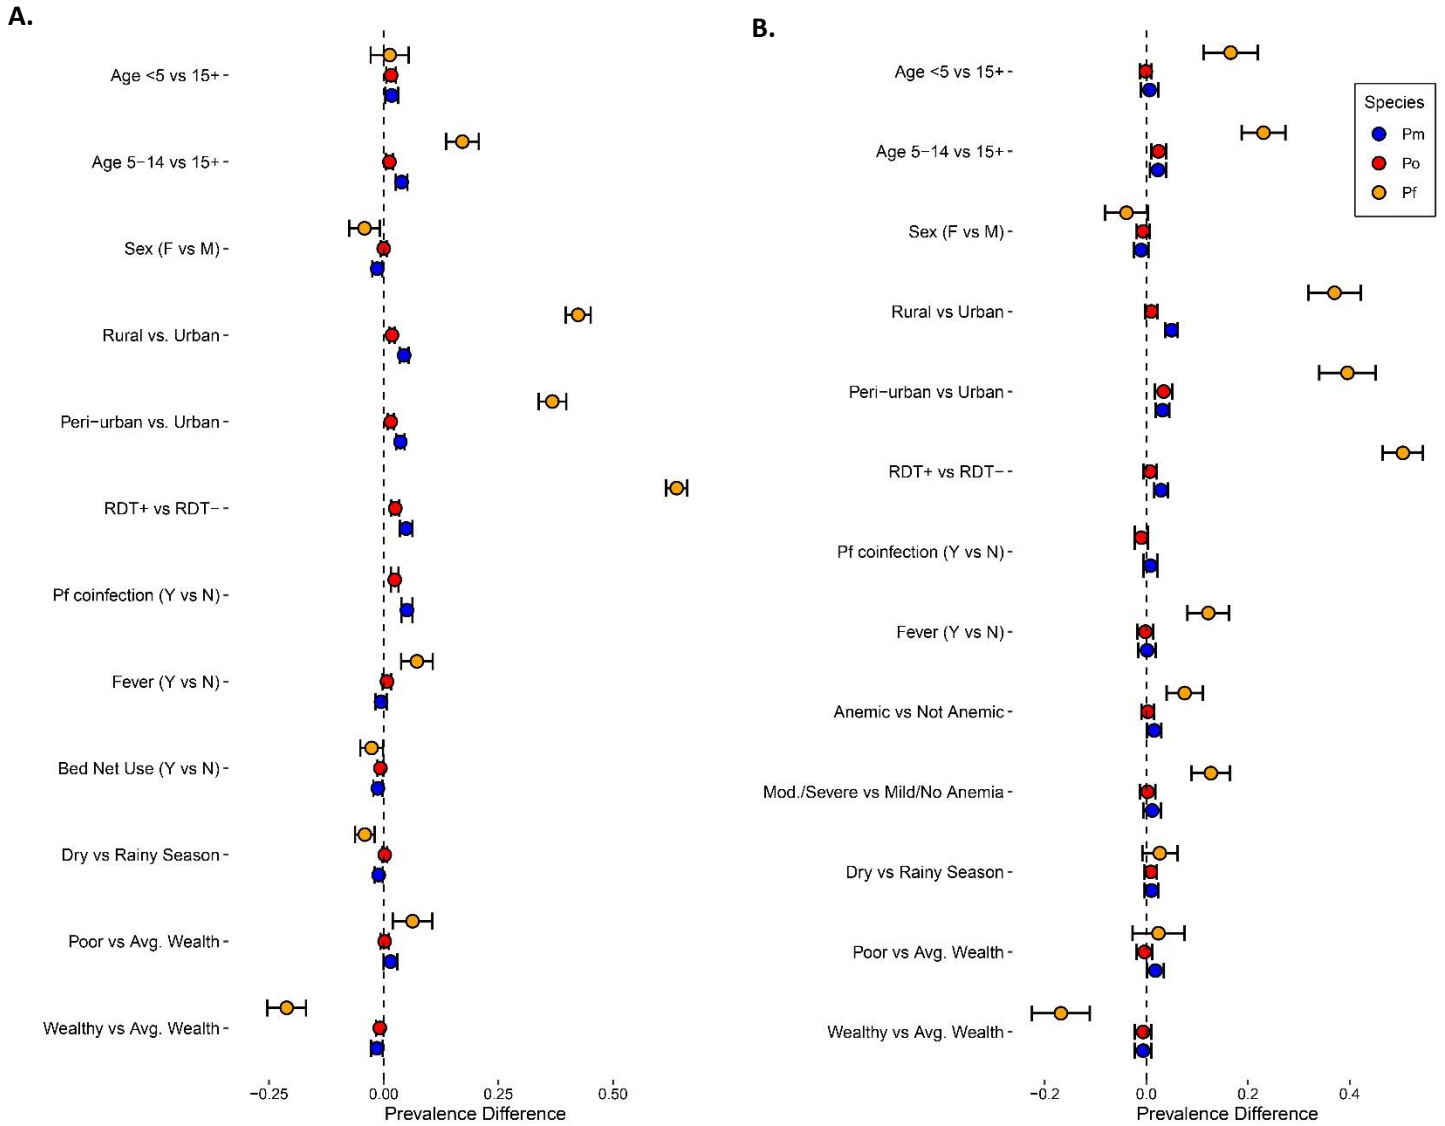

A) Factors associated with non-falciparum infection prevalence compared to *P. falciparum* infection, at survey visits (baseline and three follow-up surveys). B) Factors associated with non-falciparum infection prevalence compared to *P. falciparum* infection, at clinic visits throughout follow-up.

Supplemental Figures 2 A-D. *P. malariae* and *P. ovale* spp. infections throughout the study period, within the Total Population, encompassing infections detected at all touch points in the study (survey + clinic visits).

A.

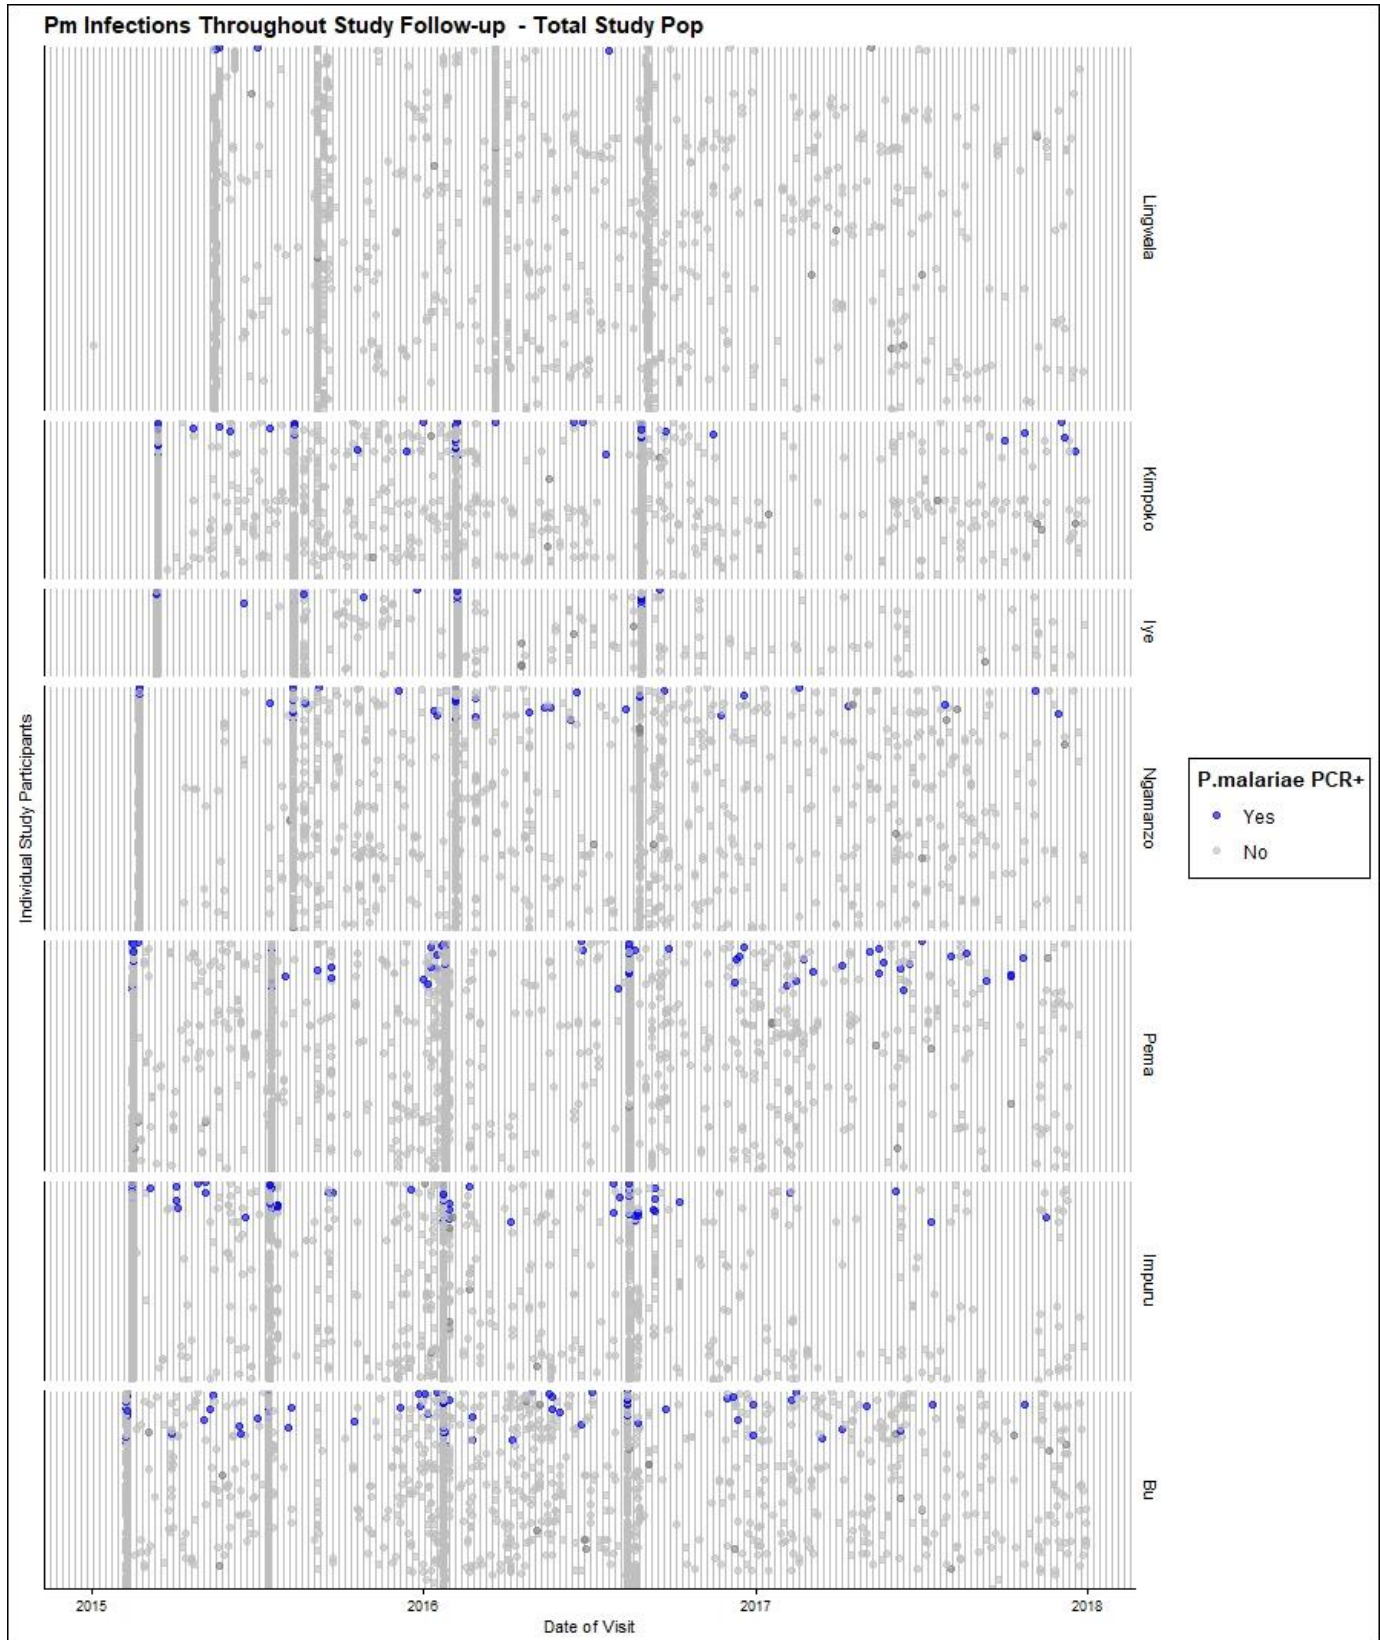

A) *P. malariae* infections detected at study visits throughout follow-up, among all subjects in the Total Population. Rows represent individual subjects, sorted by frequency of PCR+ *P. malariae* infections throughout the full study period.

B

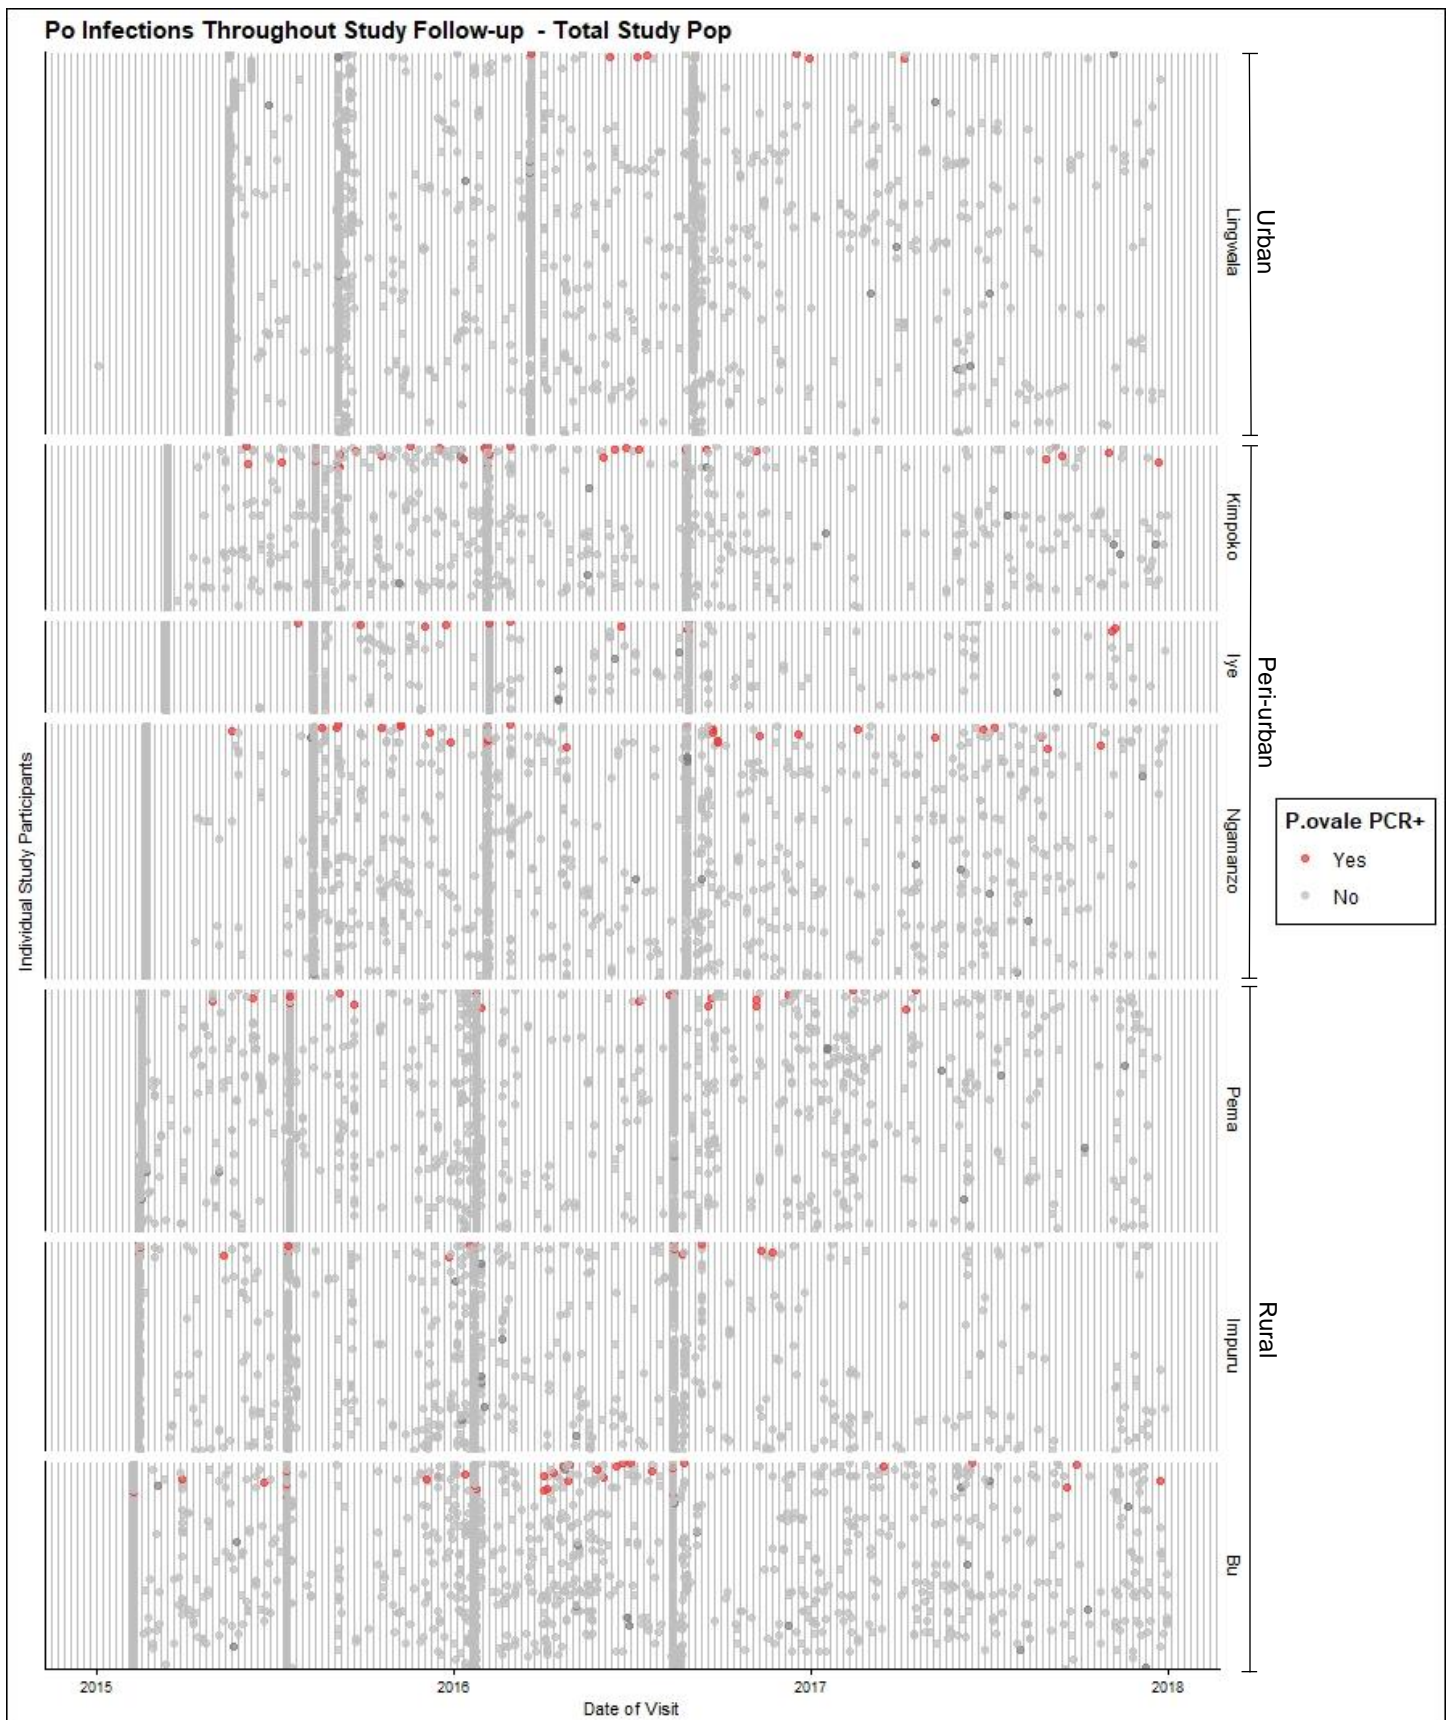

B) *P. ovale* spp. infections detected at study visits throughout follow-up, among all subjects in the Total Population. Rows represent individual subjects, sorted by frequency of PCR+ *P. ovale* spp. infections throughout the full study period.

C

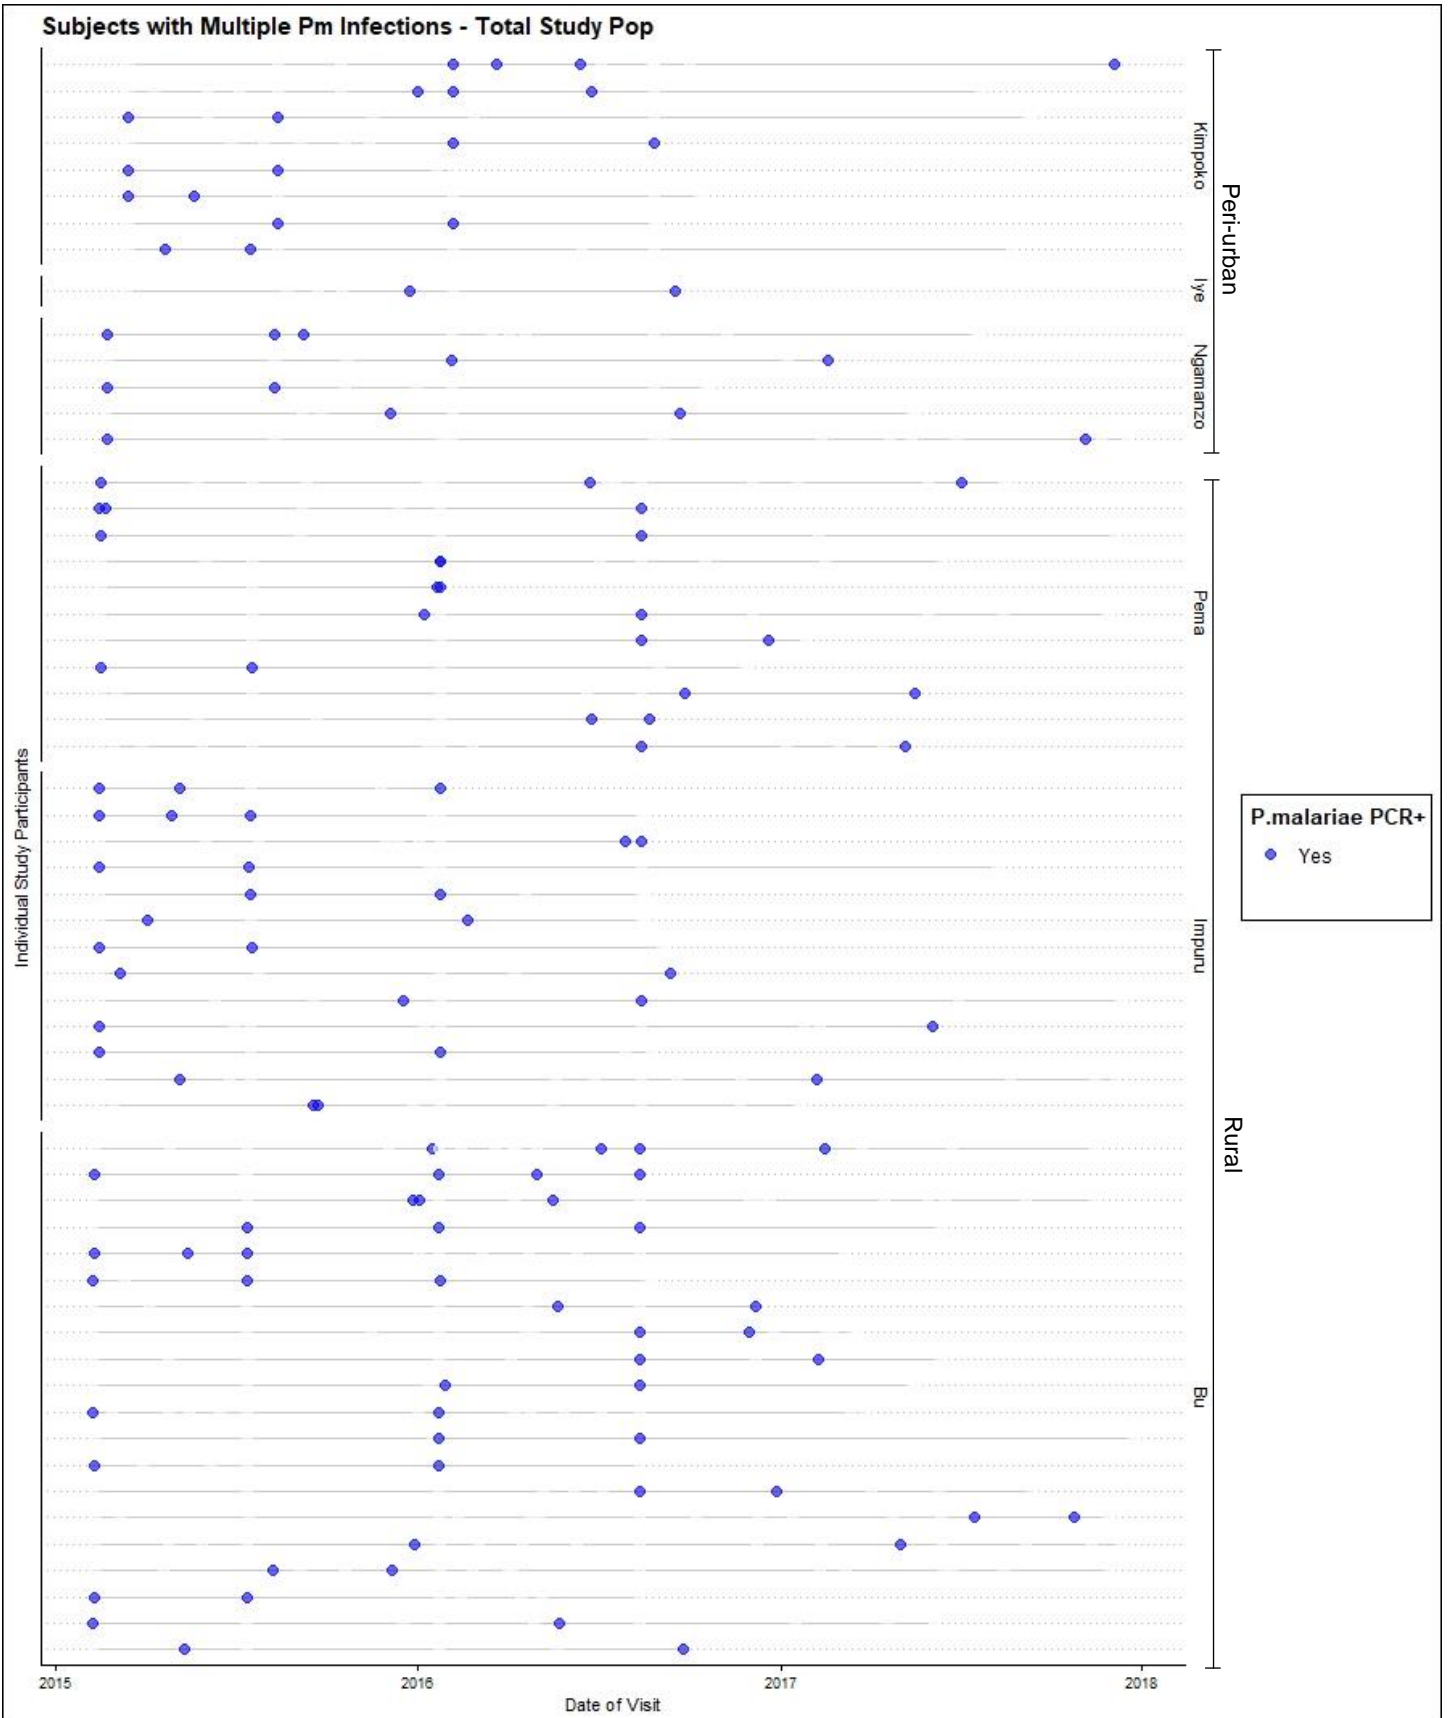

C) Multiple *P. malariae* infections detected at study visits throughout follow-up, among all subjects in the Total Population who had at least one *P. malariae* infection during the study. Rows represent individual subjects, sorted by frequency of PCR+ *P. malariae* spp. infections throughout the full study period.

D

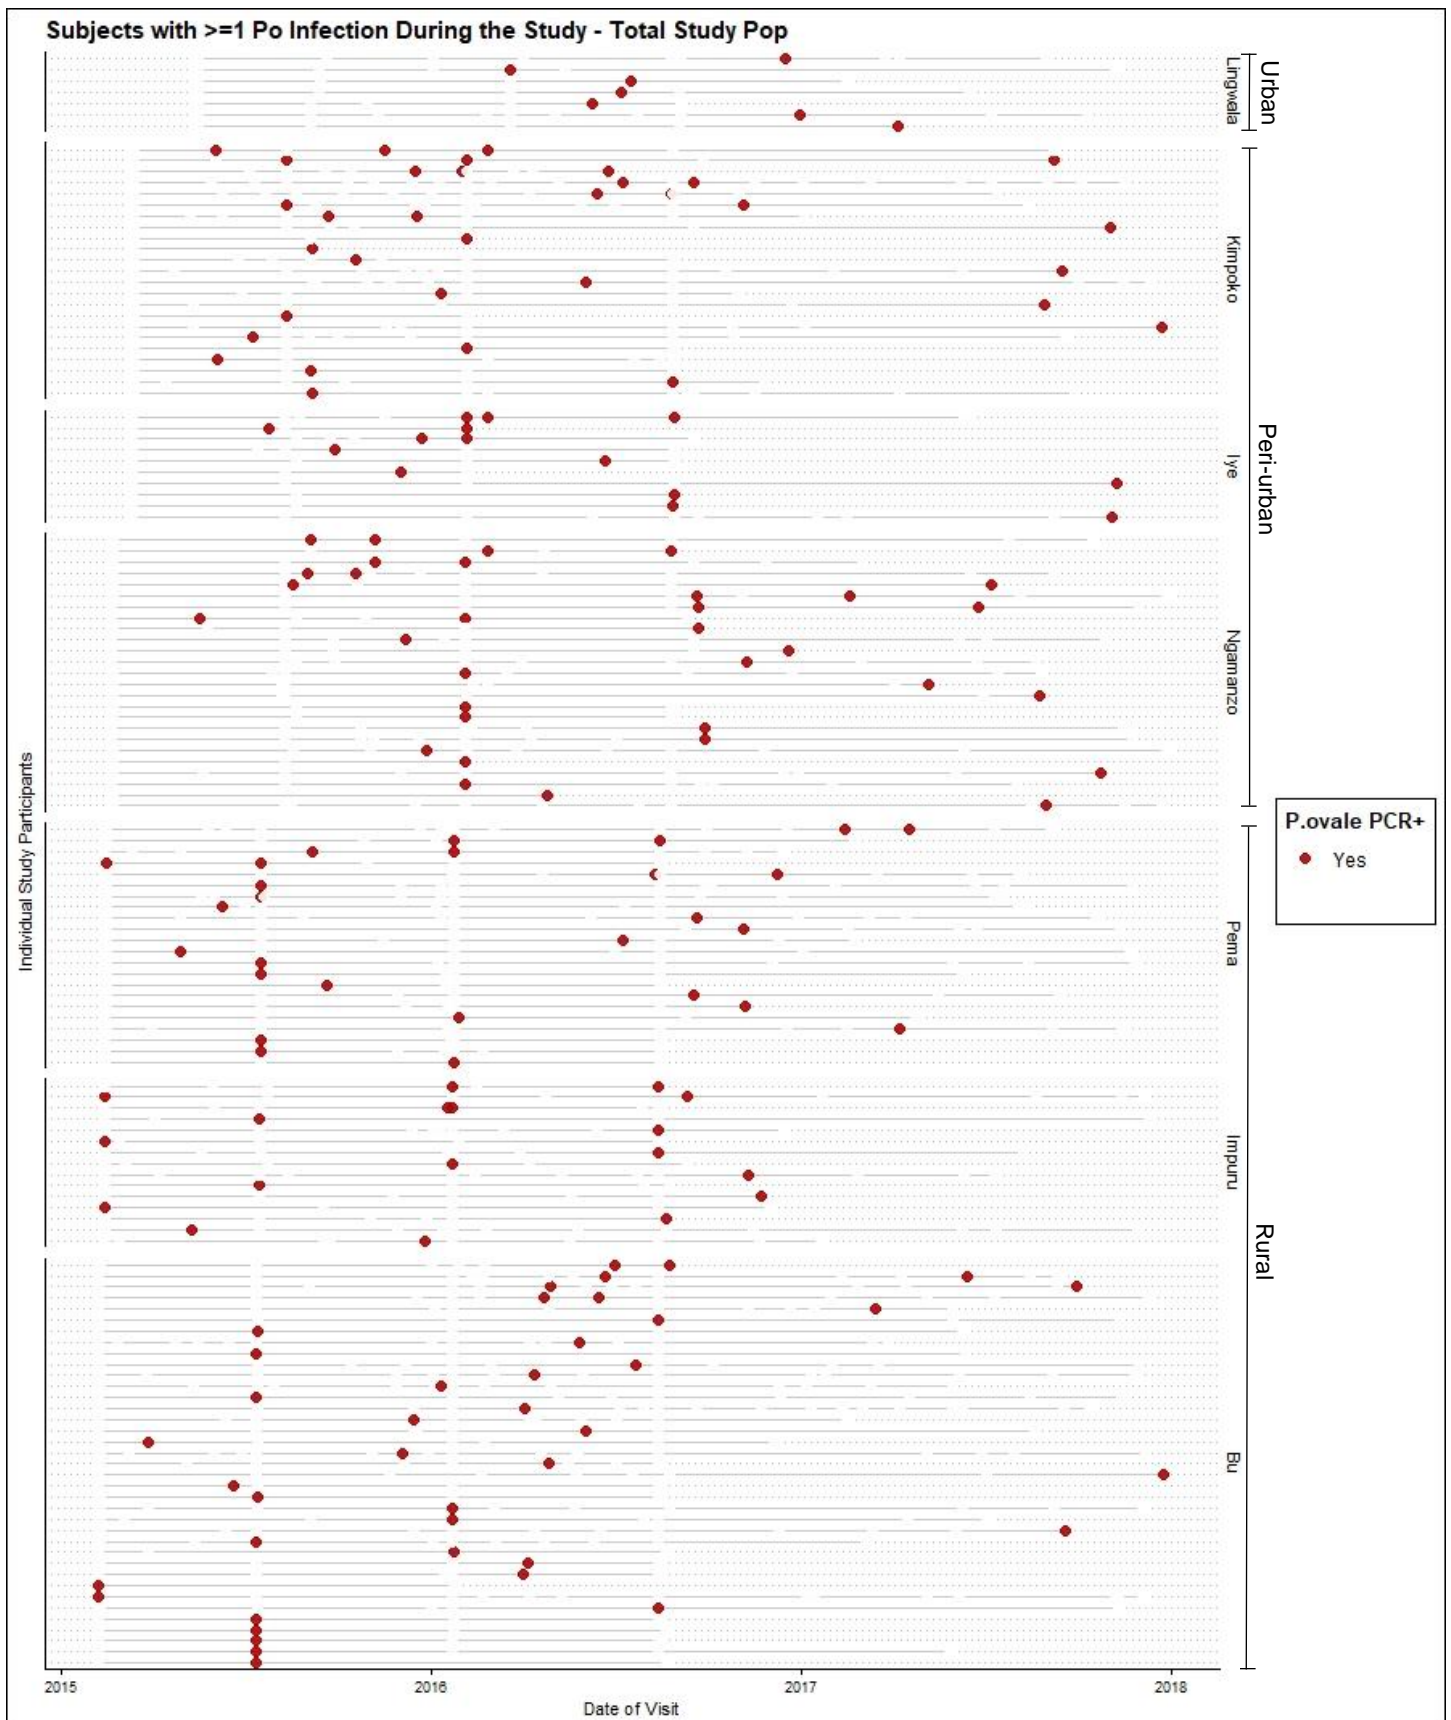

D) Multiple *P. ovale* spp. infections detected at study visits throughout follow-up, among all subjects in the Total Population who had at least one *P. ovale* spp. infection during the study. Rows represent individual subjects, sorted by frequency of PCR+ *P. ovale* spp. infections throughout the full study period.

**Supplemental Table 6. Estimated parasitemias (p/μL) by malaria species**

| Parasitemia Estimates (p/μL) |       | Survey Population – Household Survey Visits       |        |               |               |         |                                      |
|------------------------------|-------|---------------------------------------------------|--------|---------------|---------------|---------|--------------------------------------|
|                              |       | n (infect.)                                       | median | IQR           | min - max     | p-value | n excluded (rehydrated) <sup>‡</sup> |
| <b>Pm (p/μL)</b>             | Total | 175                                               | 22.4   | 8.5-72.2      | 0.8-358,246   |         | 11                                   |
|                              | Mixed | 129                                               | 21.1   | 8.5-60.1      | 1.4-358,246   | 0.259   | 8                                    |
|                              | Mono  | 46                                                | 28.8   | 9.2-125       | 0.8-688       |         | 3                                    |
| <b>Po (p/μL)</b>             | Total | 71                                                | 5.8    | 2.0-28.0      | 0.6-106,476   |         | 7                                    |
|                              | Mixed | 56                                                | 5.7    | 2.3-23.0      | 0.6-106,476   | 0.662   | 5                                    |
|                              | Mono  | 15                                                | 9.5    | 1.7-92.2      | 0.8-252       |         | 2                                    |
| <b>Pf (p/μL)</b>             | Total | 1760                                              | 52.6   | 8.2-343.3     | 0.6-268250.0  |         | 216                                  |
|                              | Mixed | 176                                               | 120.5  | 31.9-496.3    | 0.8-22925.0   | <0.001  | 12                                   |
|                              | Mono  | 1584                                              | 46.9   | 7.4-311.1     | 0.6-268250.0  |         | 204                                  |
| Parasitemia Estimates (p/μL) |       | Clinic sub-Population – Symptomatic Clinic Visits |        |               |               |         |                                      |
|                              |       | n (infect.)                                       | median | IQR           | min - max     | p-value | n excluded (rehydrated)              |
| <b>Pm (p/μL)</b>             | Total | 132                                               | 36.5   | 4.7-182       | 0.6-23,288    |         | 3                                    |
|                              | Mixed | 88                                                | 31.8   | 3.6-157       | 0.6-2,432     | 0.239   | 1                                    |
|                              | Mono  | 44                                                | 51.5   | 15.2-204      | 1.3-23,288    |         | 2                                    |
| <b>Po (p/μL)</b>             | Total | 93                                                | 17.7   | 4.6-65.8      | 0.2-2,875     |         | 2                                    |
|                              | Mixed | 51                                                | 17.8   | 4.9-68.6      | 0.3-1,447     | 0.740   | 1                                    |
|                              | Mono  | 42                                                | 16.7   | 4.5-65.5      | 0.2-2,875     |         | 1                                    |
| <b>Pf (p/μL)</b>             | Total | 1970                                              | 2644.3 | 113.2-16931.1 | 0.6-1,165,100 |         | 39                                   |
|                              | Mixed | 134                                               | 508.7  | 58.8-8387.1   | 2.1-119,100   | 0.001   | 2                                    |
|                              | Mono  | 1834                                              | 2897   | 126.5-18058.3 | 0.6-1,165,100 |         | 37                                   |
| Parasitemia Estimates (p/μL) |       | Total Population = Survey and Clinic Visits       |        |               |               |         |                                      |
|                              |       | n (infect.)                                       | median | IQR           | min - max     | p-value | n excluded (rehydrated)              |
| <b>Pm (p/μL)</b>             | Total | 307                                               | 25.7   | 7.7-119       | 0.6-358,246   |         | 14                                   |
|                              | Mixed | 217                                               | 22.4   | 6.9-108       | 0.6-358,246   | 0.071   | 9                                    |
|                              | Mono  | 90                                                | 36.5   | 11.8 -187     | 0.8-23,288    |         | 5                                    |
| <b>Po (p/μL)</b>             | Total | 164                                               | 10.2   | 2.7-47.4      | 0.2-106,476   |         | 9                                    |
|                              | Mixed | 107                                               | 10.8   | 2.8-36.4      | 0.3-106.476   | 0.465   | 6                                    |
|                              | Mono  | 57                                                | 15.8   | 2.2-65.8      | 0.2-2,875     |         | 3                                    |
| <b>Pf (p/μL)</b>             | Total | 3730                                              | 266.5  | 18.8-4525.5   | 0.6-1,165,100 |         | 255                                  |
|                              | Mixed | 310                                               | 190    | 40.7-1427.4   | 0.8-119,100   | 0.209   | 14                                   |
|                              | Mono  | 3418                                              | 279.6  | 17.4-5014.6   | 0.6-1,165,100 |         | 241                                  |
